# Supplementary material for: Facile synthesis of electrocatalytically active Cu/graphite using the negative electrode of spent Li-ion batteries
Source: Royal Society of Chemistry journal article supplement (doi:10.1039/d3gc04472f), 2024-01-01
Supplement: d3gc04472f1.pdf [file d3gc04472f1.pdf]

## Electronic supplementary information for Facile synthesis of electrocatalytically active Cu/graphite using the negative electrode of spent Li-ion batteries

Hiroshi Itahara\*, Naonari Sakamoto, Naoko Takahashi, Satoru Kosaka and Yasuhiro Takatani

Toyota Central R&D Labs., Inc., 41-1 Yokomichi Nagakute, Aichi 480-1192, Japan  
E-mail: h-itahara@mosk.tytlabs.co.jp

### (1) Characteristics of S-NE sample

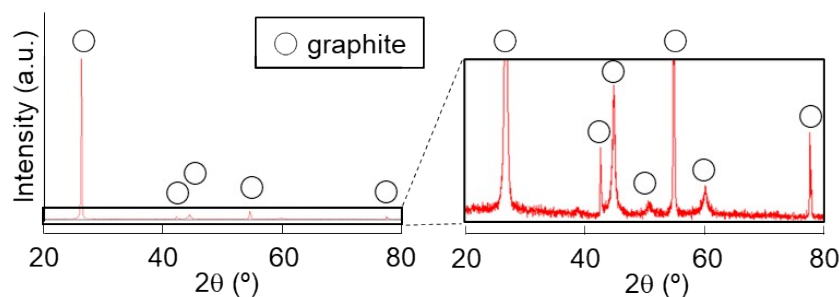

Figure S1. Powder XRD pattern for S-NE sample.

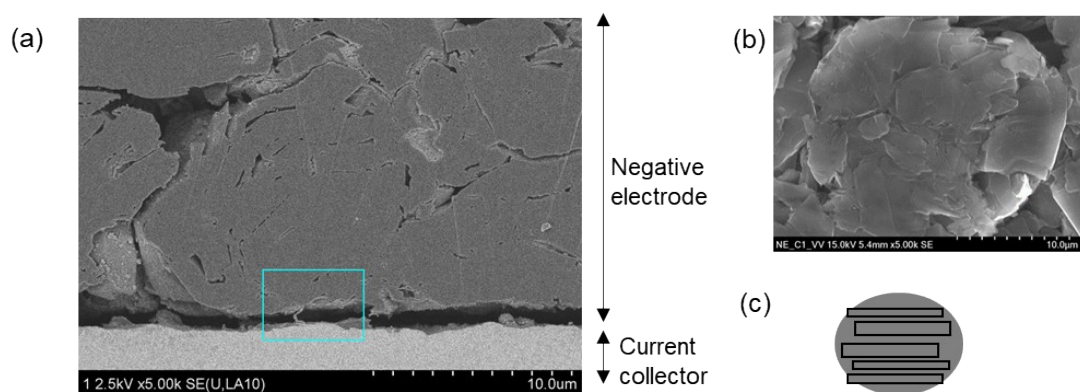

Figure S2. (a) Cross-sectional SEM image of the negative electrode layer of a spent lithium-ion battery, (b) SEM image taken for the surface of the negative electrode layer and (c) schematic representation of agglomerates of primary graphite platelets.

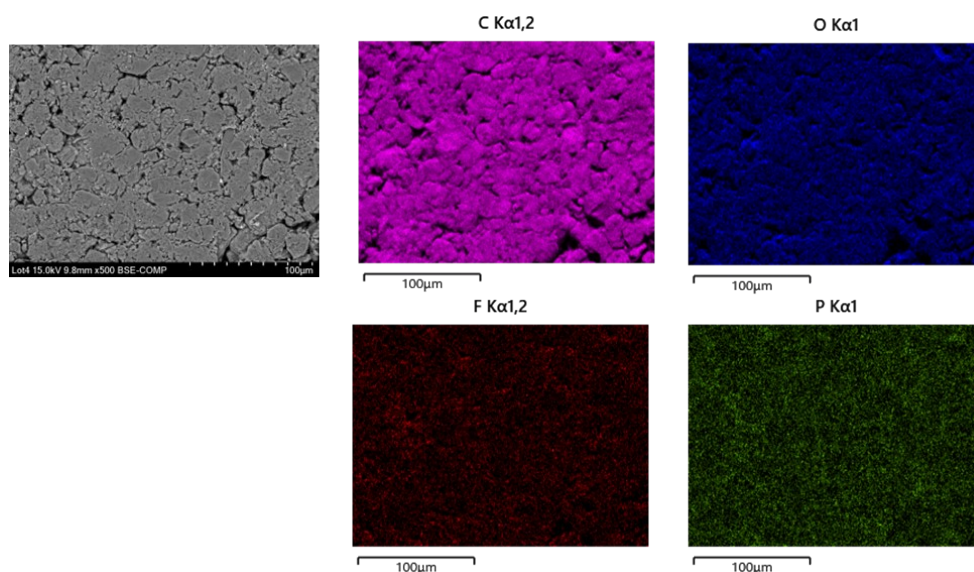

Figure S3. SEM and SEM-EDX mapping images for S-NE sample powder.

- (2) Composition analysis by inductively coupled plasma mass spectrometry (ICP-MS, Agilent Technologies, Agilent 8900) and combustion ion chromatography by a combination of an automated combustion unit (Nittoseiko Analytech Co., Ltd, AQF-100) and an IC system (Thermo Fisher Scientific, ICS-1100).

Table S1. Amounts of impurities and copper loaded (wt%)

|             | Li   | F    | P    | Ni  | Co   | Al    | Cu    | Cl   |
|-------------|------|------|------|-----|------|-------|-------|------|
| S-NE        | 1.3  | 1.1  | 0.37 | 2.6 | 0.47 | 0.155 | 0.006 | 0.02 |
| W-NE        | 0.17 | 0.04 | 0.03 | 1.6 | 0.27 | 0.076 | 0.005 | 0.01 |
| Cu-NE_RT    | 0.15 | 0.05 | 0.26 | 1.5 | 0.27 | 0.12  | 3.3   | 0.07 |
| Cu-NE_HT450 | 0.16 | 0.07 | 0.17 | 1.6 | 0.28 | 0.17  | 3.4   | 0.06 |

(3) Peeling test

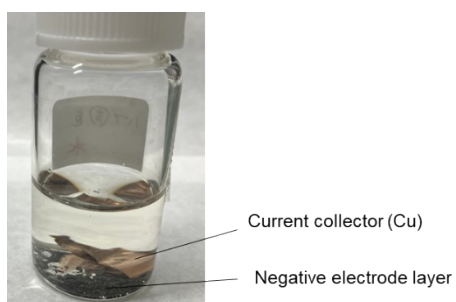

Figure S4. Photograph taken for the negative electrode immersing into water

(4) Comparison of S-NE and Cu-NE\_RT samples

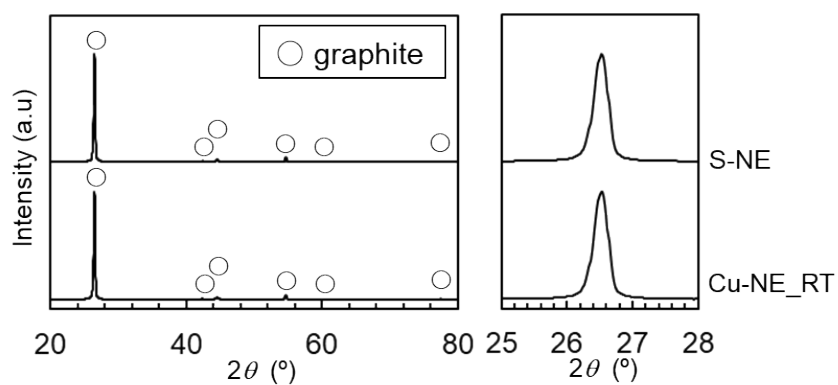

Figure S5. Powder XRD patterns for S-NE and Cu-NE\_RT samples

(5) XAFS measurements for Cu-NE\_RT samples

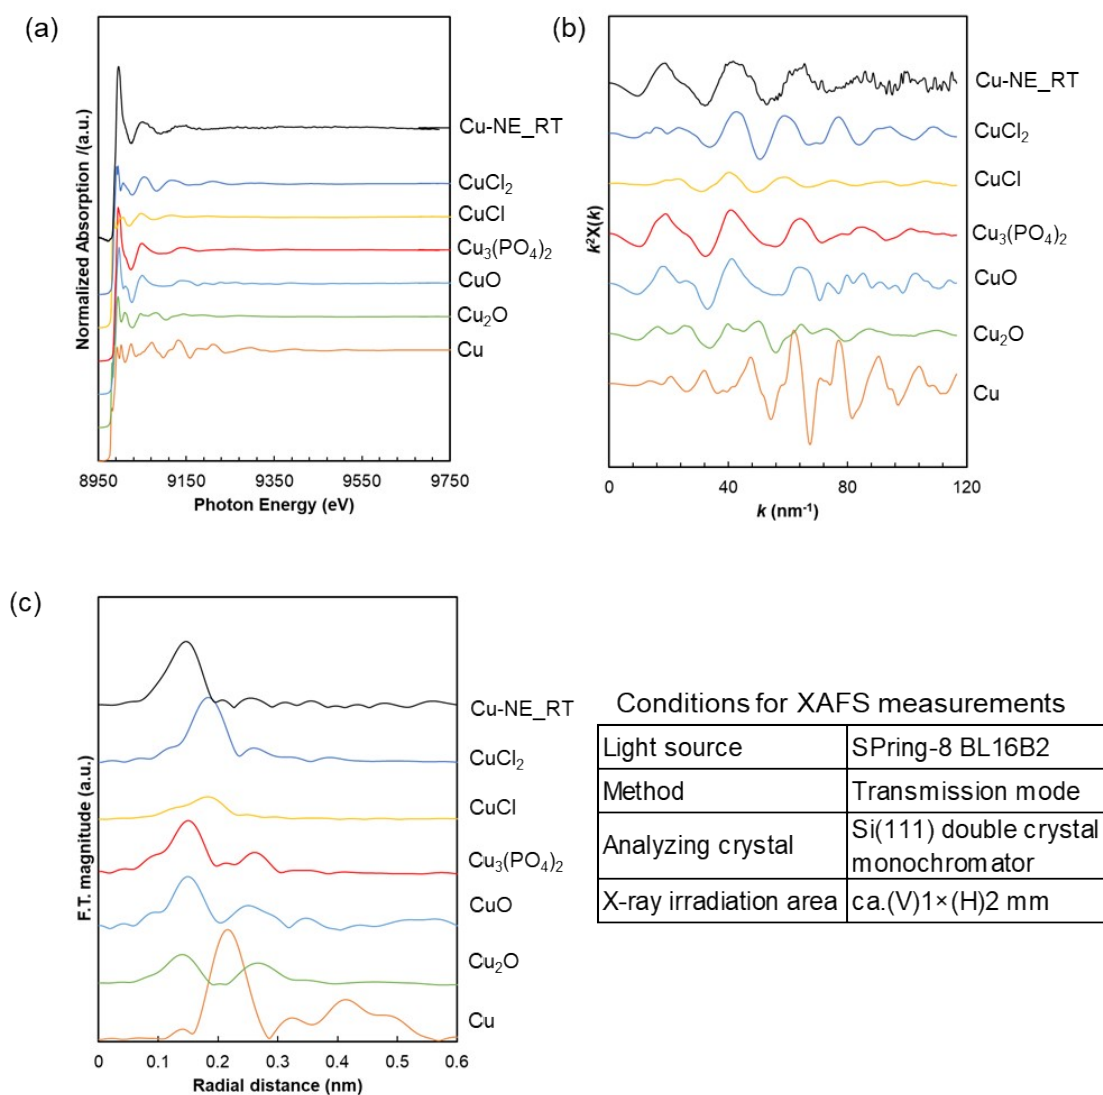

Figure S6. (a) Cu K-edge X-ray absorption spectra for Cu-NE\_RT and reference (metallic Cu and copper oxides) samples. (b)  $k^2$ -weighted oscillations extracted from the Cu K-edge extended X-ray absorption fine structure spectra as functions of the wave vector. (c) Fourier transforms derived from the oscillations. The range of the Fourier transformation is  $k = 30\text{--}100 \text{ nm}^{-1}$ .

(6) Raman spectrum

*Ex situ* Raman spectroscopy was performed using an excitation laser with a wavelength of 532 nm and a laser Raman microscope (Nanophoton Corp., RAMANtouch). The intensity of the laser beam was approximately 0.3 mW, the exposure time was 2 s, and the acquisition time for a Raman spectrum was 20 s.

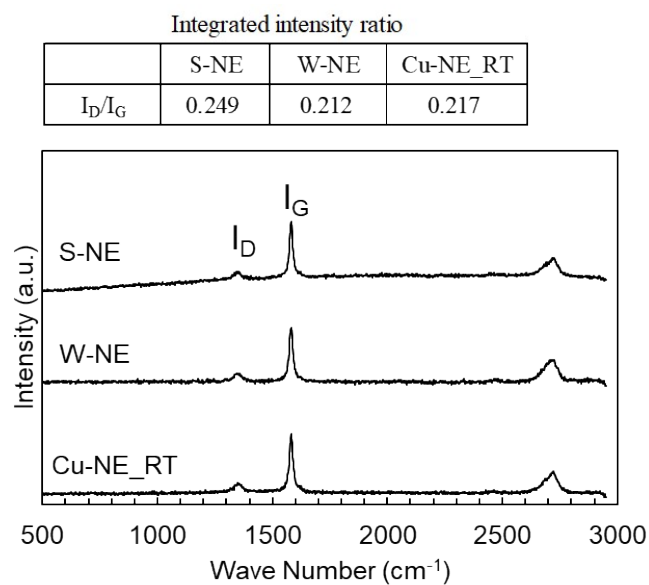

Figure S7. Raman spectra for S-NE, W-NE and Cu-NE\_RT samples.

(7) Microstructural analysis for reference samples

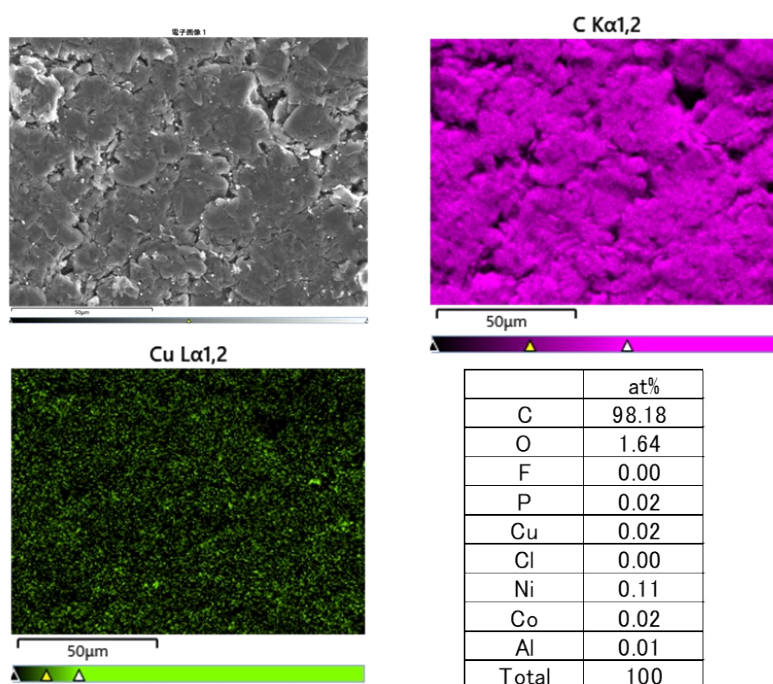

Figure S8. SEM and SEM-EDX mapping images for the sample prepared by dispersing W-NE powder into  $\text{CuCl}_2$  aqueous solution.

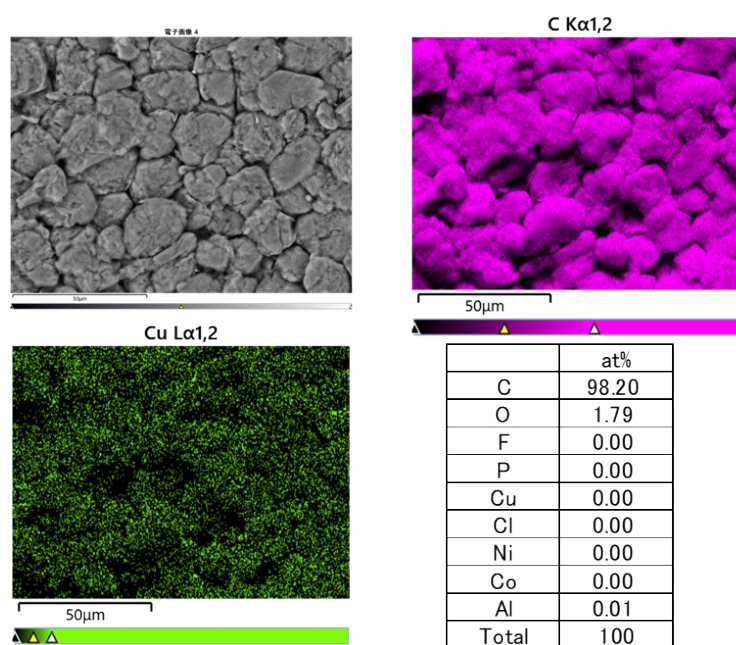

Figure S9. SEM and SEM-EDX mapping images for the sample prepared by dispersing pristine graphite powder (commercial powder, OMAC) into  $\text{CuCl}_2$  aqueous solution.

(8) Microstructural analysis for Ni-NE, Co-NE and Fe-NE\_RT samples

Fe-NE, Co-NE and Ni-NE\_RT samples were prepared in the same process for the Cu-NE\_RT sample. S-NE powder (250 mg) was dispersed into a  $MCl_2$  aqueous solution ( $M=Fe, Co$  or  $Ni$ , 7.4 mM, 100 mL) and ultrasonicated for 15 min at room temperature; the product was collected by filtration and dried under vacuum at 80 °C for 2 h.

(a)

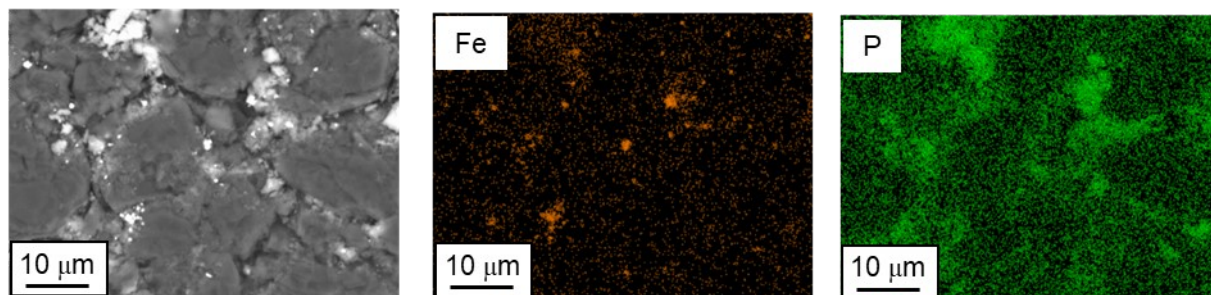

(b)

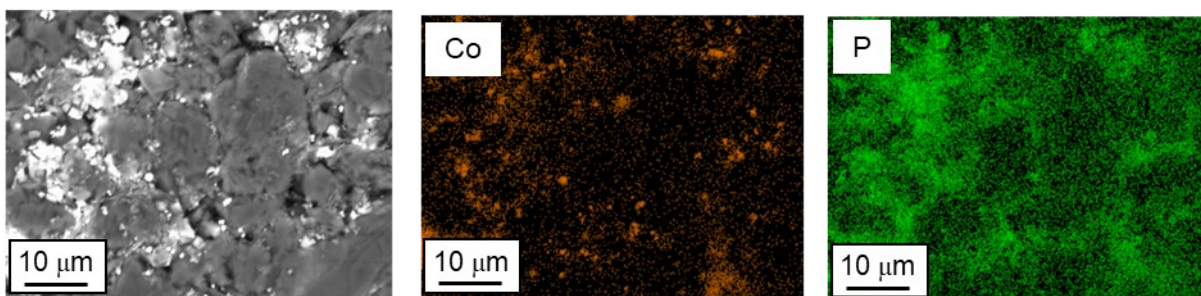

(c)

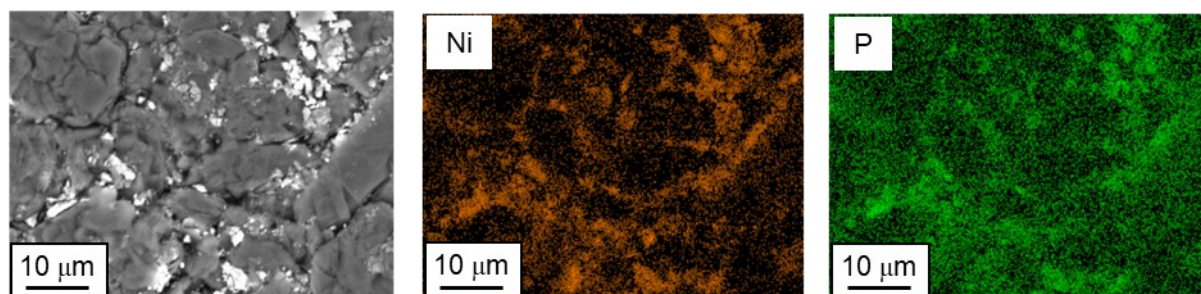

Figure S10. SEM and SEM-EDX mapping images for (a) Fe-NE, (b) Co-NE and (c) Ni-NE\_RT samples.

(9) Microstructural analysis for Cu-NE\_RT sample

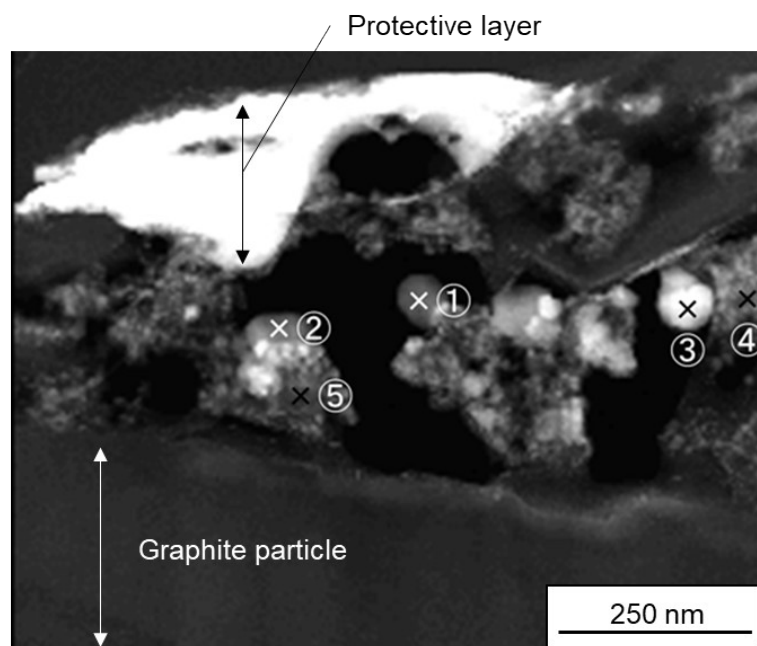

|      |       | at%   |       |       |       |  |
|------|-------|-------|-------|-------|-------|--|
|      | ①     | ②     | ③     | ④     | ⑤     |  |
| C    | 19.71 | 22.70 | 19.73 | 57.19 | 56.79 |  |
| Cu   | 75.84 | 73.36 | 74.38 | 22.54 | 21.85 |  |
| O    | 0.56  | 1.50  | 2.06  | 14.11 | 14.63 |  |
| P    | 1.13  | 0.58  | 0.71  | 5.40  | 5.55  |  |
| F    | 2.02  | 1.59  | 2.56  | —     | —     |  |
| Cl   | 0.05  | —     | 0.24  | 0.63  | 1.09  |  |
| Ni   | —     | 0.11  | 0.12  | 0.03  | 0.04  |  |
| Co   | 0.02  | 0.16  | 0.11  | 0.11  | —     |  |
| Al   | 0.66  | —     | 0.09  | —     | 0.05  |  |
|      | 100   | 100   | 100   | 100   | 100   |  |
| P/Cu | 0.01  | 0.01  | 0.01  | 0.24  | 0.25  |  |
| O/Cu | 0.01  | 0.02  | 0.03  | 0.63  | 0.67  |  |

Figure S11. Cross-sectional STEM image for Cu-NE\_RT sample.



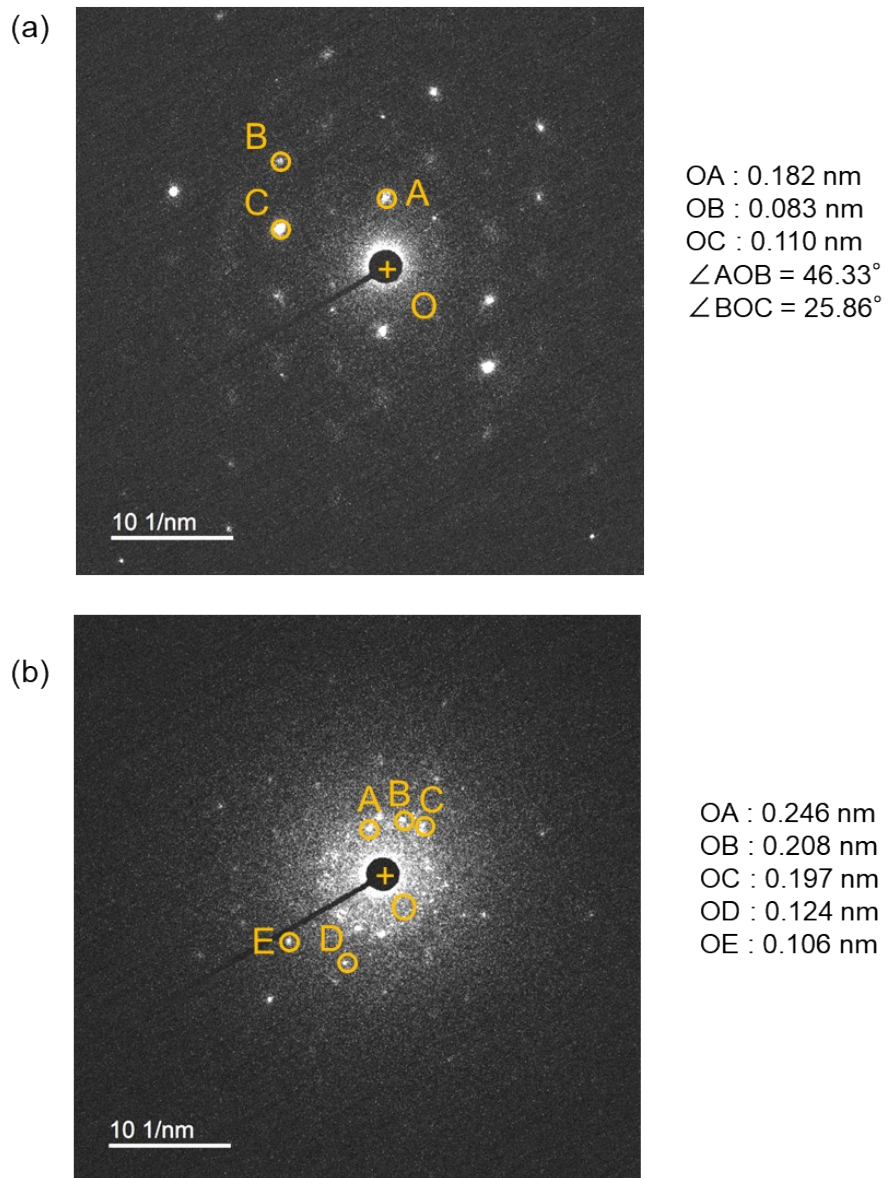

Figure S12. Nano beam diffraction patterns for (a) position No.1 and (b) position No.4 in Fig.S10.

(10) XAFS measurements for Cu-NE\_RT and Cu-NE\_HT samples

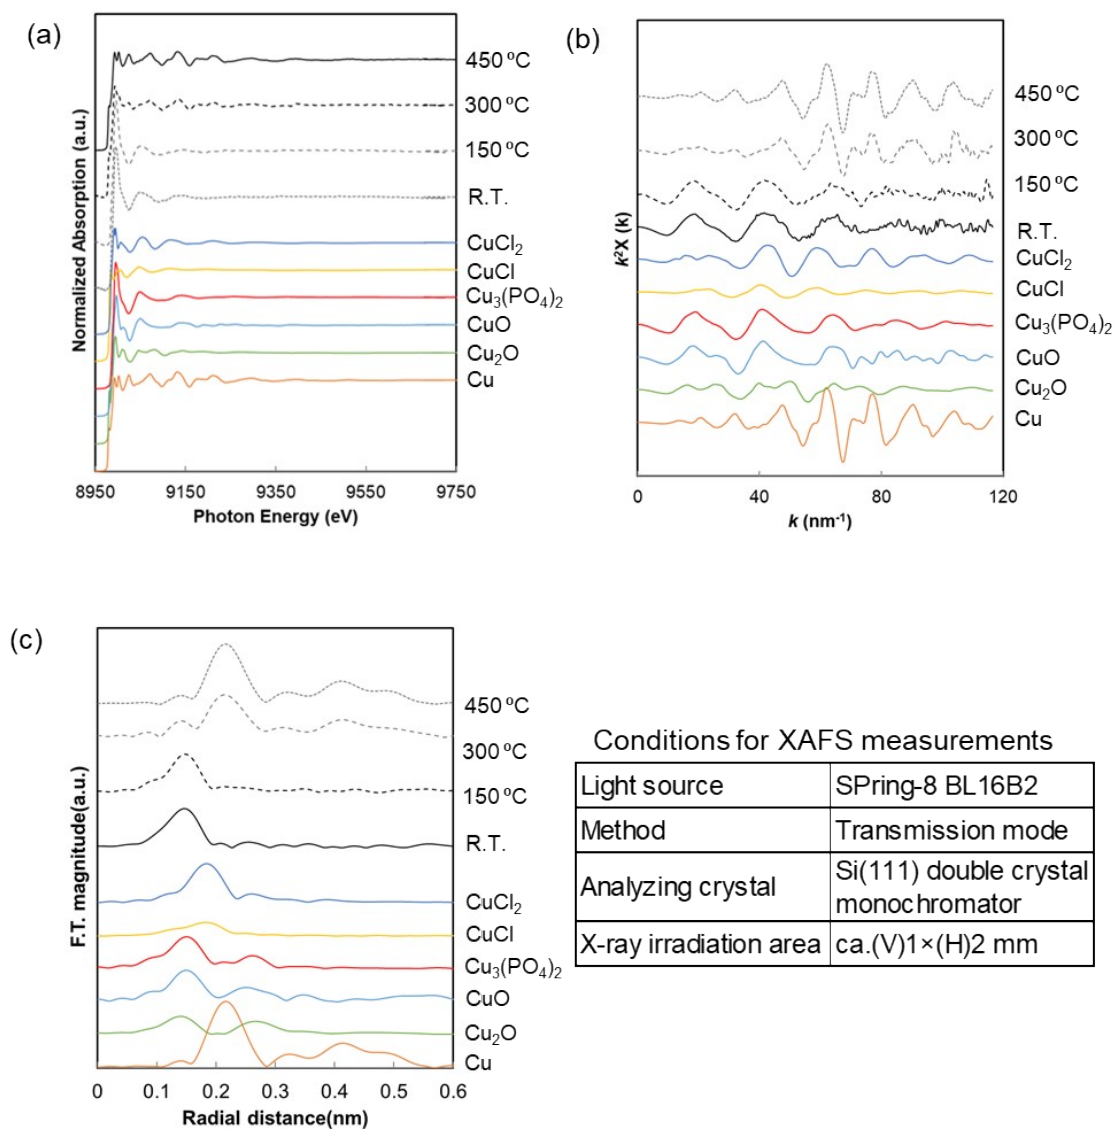

Figure S13. (a) Cu K-edge X-ray absorption spectra for Cu-NE\_RT, Cu-NE\_HT and reference (metallic Cu and copper oxides) samples. (b)  $k^2$ -weighted oscillations extracted from the Cu K-edge extended X-ray absorption fine structure spectra as functions of the wave vector. (c) Fourier transforms derived from the oscillations. The range of the Fourier transformation is  $k = 30\text{--}100 \text{ nm}^{-1}$ .

(11) Characteristics of the reference Cu-Gr\_imp and Cu-Gr\_mix samples

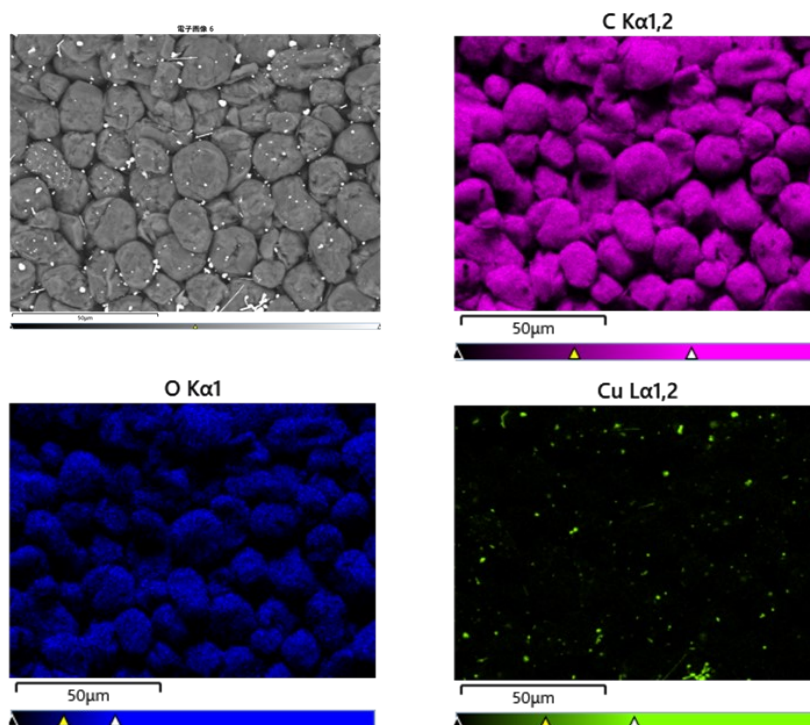

Figure S14. SEM image and SEM-EDX mapping images for Cu-Gr\_imp sample.

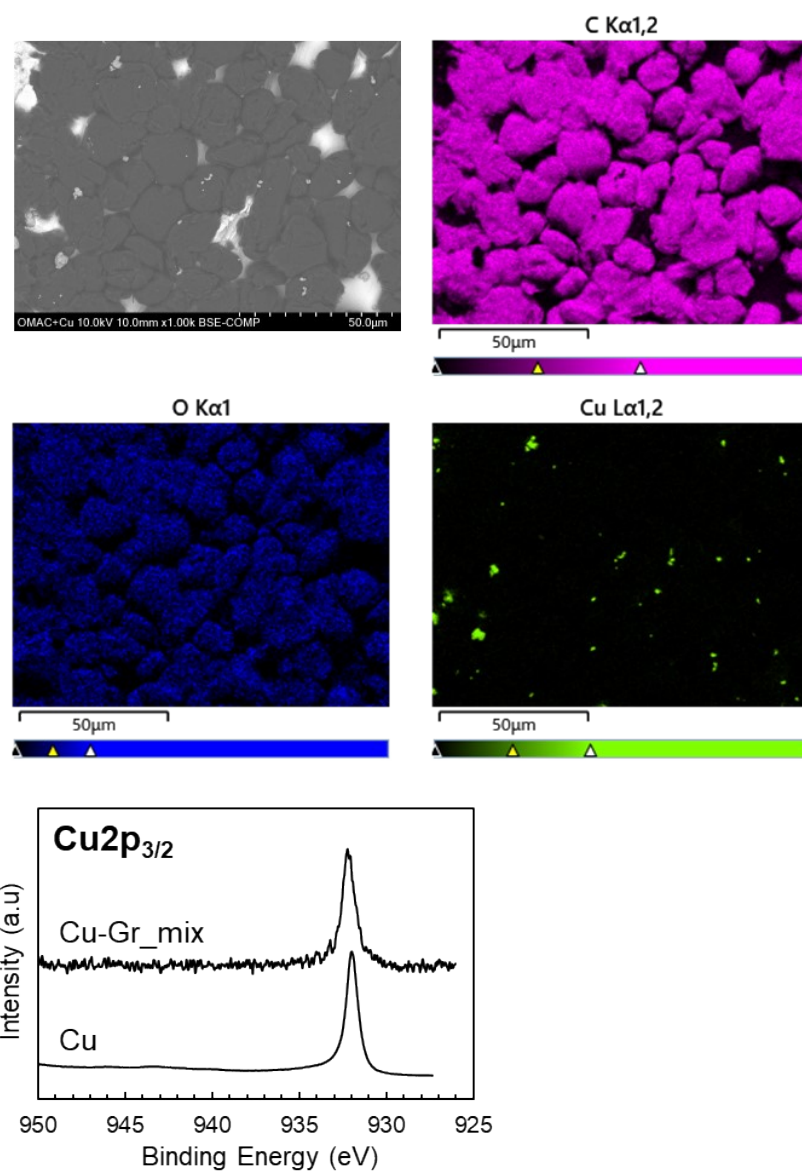

Conditions for HAXPES measurements

|                        |                                  |
|------------------------|----------------------------------|
| Light source           | SPring-8 BL16XU                  |
| Photon energy          | 7.942 keV                        |
| Take off angle         | 80°                              |
| X-ray irradiation area | ca.(V)40 $\times$ (H)350 $\mu$ m |

Figure S15. SEM image, SEM-EDX mapping images and HAXPES spectrum for Cu-Gr\_mix sample (Cu: commercial sample).

(12) Microstructural analysis for Cu-NE\_ECT sample

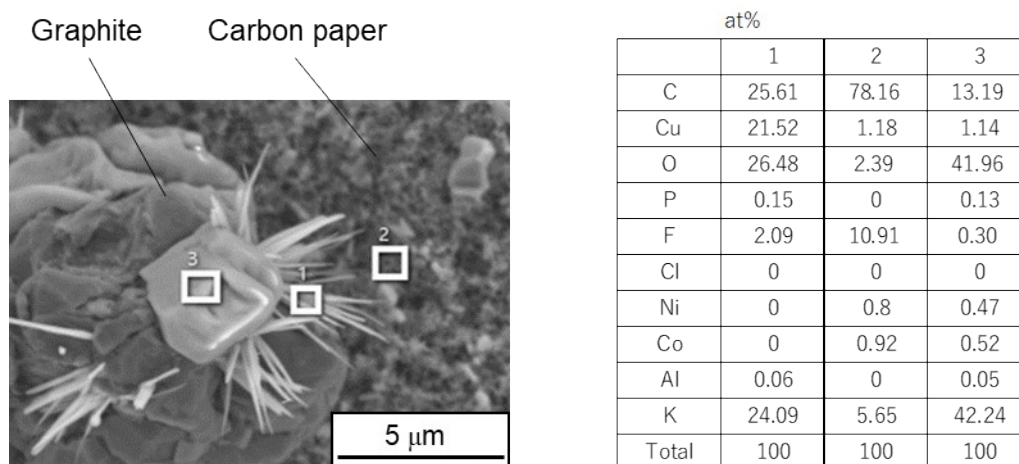

Figure S16. SEM images and SEM-EDX data for Cu-NE\_ECT sample.

(13) Dissolved amount of Cu in anolyte solution

Dissolved amount of Cu in anolyte after electrochemical treatment (ECT) by using inductively coupled plasma mass spectrometry (ICP-MS, Agilent Technologies, Agilent 8900).

Table S2. Dissolved amount of Cu in anolyte ( $\mu\text{g/ml}$ )

|           |      |
|-----------|------|
| Cu-NE_ETC | 0.35 |
| NE_HT450  | 0.12 |
| Cu_Gr_mix | 0.32 |

(14) Characteristics of Cu-NE\_HT450 sample after electrochemical measurements

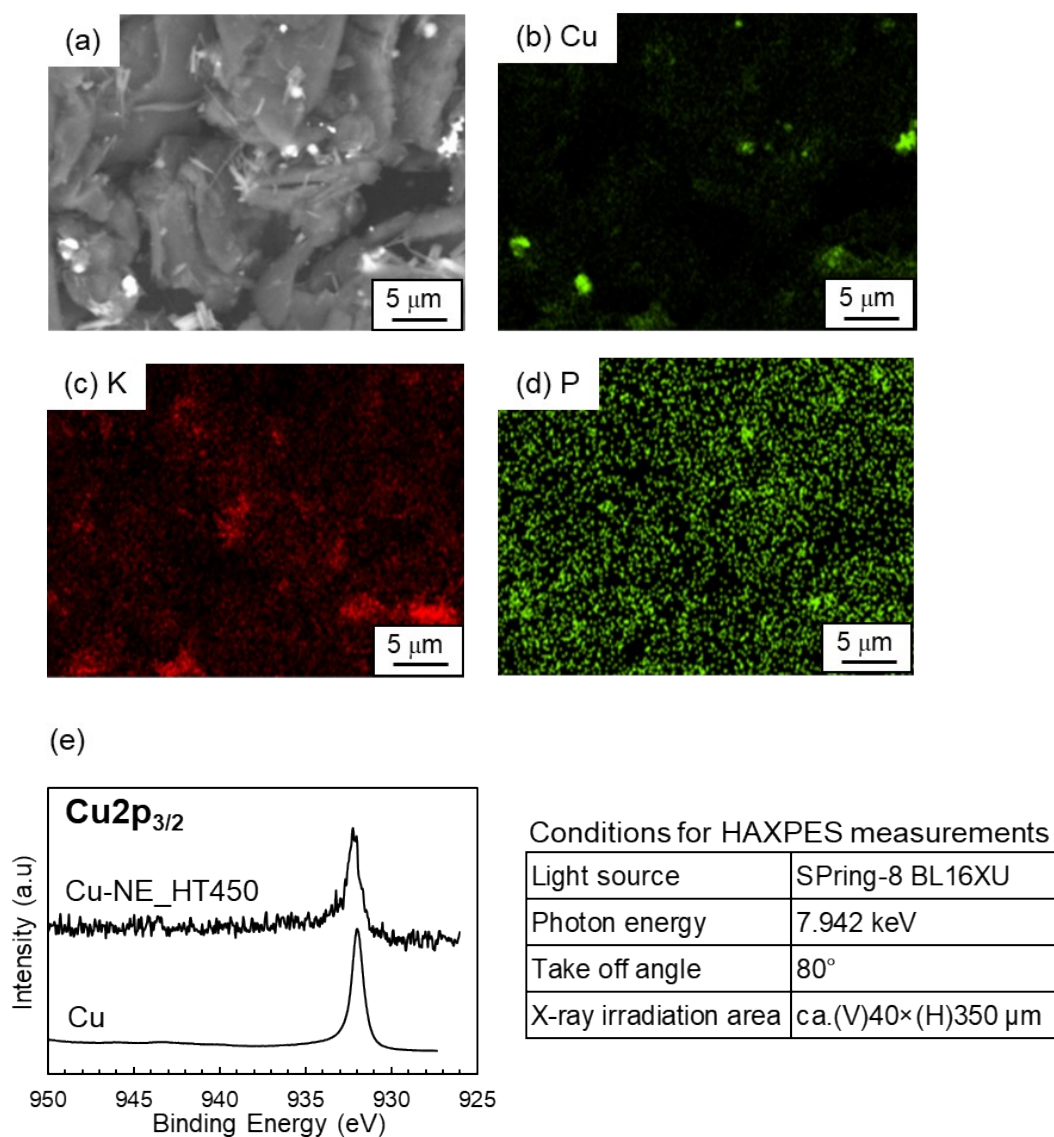

Figure S17. (a) SEM image, (b)-(d) SEM-EDX mapping images and (e) HAXPES spectrum for Cu-NE\_HT450 sample after electrochemical measurements (Cu in (d): commercial sample).

(15) Characteristics of Cu-Gr\_mix sample after electrochemical measurements

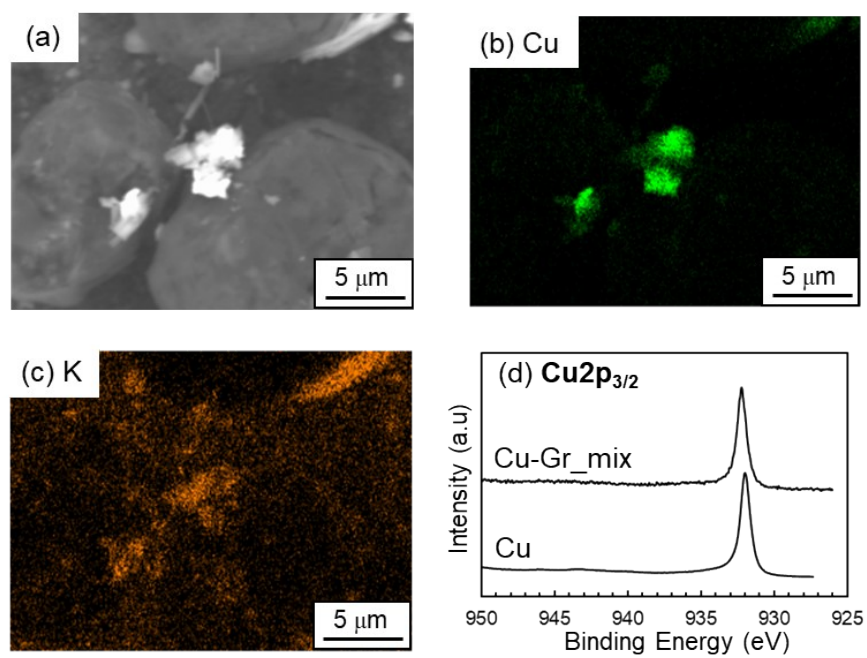

Conditions for HAXPES measurements

|                        |                    |
|------------------------|--------------------|
| Light source           | SPring-8 BL16XU    |
| Photon energy          | 7.942 keV          |
| Take off angle         | 80°                |
| X-ray irradiation area | ca.(V)40×(H)350 μm |

Figure S18. (a) SEM image, (b),(c) SEM-EDX mapping images and (d) HAXPES spectrum for Cu-Gr\_mix sample after electrochemical measurements (Cu in (d): commercial sample).

(16) Electrochemical properties for S-NE and W-NE samples

Electrical flow and gas generation were observed during electrochemical measurements. The measurement conditions are described in the main text.

Current efficiency is defined as follows:

$$\text{Current efficiency (\%)} = (\text{mole number} \times \text{electron number}) / (\text{total charge} / \text{Faraday constant}) \times 100$$

Here, the molar number of each product was calculated using the amount measured and the molar weight. The electron number required to produce CO, CH<sub>4</sub>, C<sub>2</sub>H<sub>4</sub> are 2, 8 and 12, respectively.

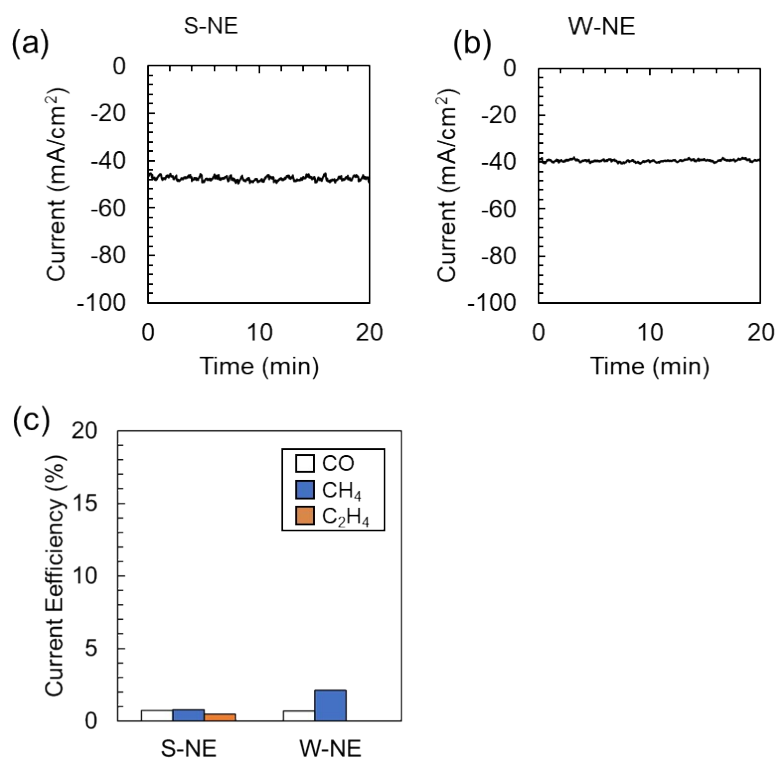

Figure S19. (a),(b) current density change on time and (c) current efficiency for production of CO, CH<sub>4</sub> and C<sub>2</sub>H<sub>4</sub> for S-NE and W-NE samples.



(17) Electrochemical properties for Cu-NE\_ETC, Cu-NE\_HT450 and Cu-Gr\_mix samples

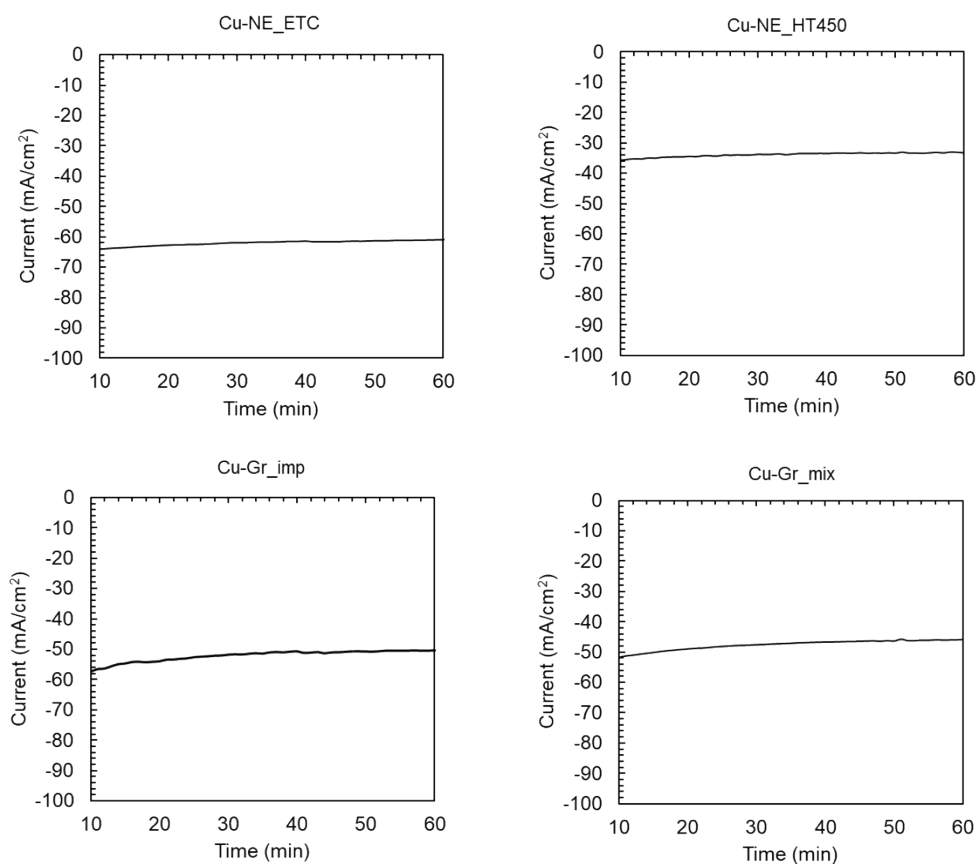

Figure S20. Current density change on time for Cu-NE\_ETC, Cu-NE\_HT450, Cu-Gr\_imp and Cu-Gr\_mix samples.

Table.S3 Current efficiencies of C<sub>1</sub> (CO, CH<sub>4</sub> and formic acid) and C<sub>2+</sub> (C<sub>2</sub>H<sub>4</sub>, ethanol and propanol), and the C<sub>2+</sub>/C<sub>1</sub> ratio.

|             | H <sub>2</sub> | CH <sub>4</sub> | CO   | HCOOH | C <sub>2</sub> H <sub>4</sub> | EtOH | PrOH | C <sub>2+</sub> /C <sub>1</sub> |
|-------------|----------------|-----------------|------|-------|-------------------------------|------|------|---------------------------------|
| Cu-NE_ETC   | 59.1           | 3.72            | 0.00 | 1.00  | 3.58                          | 3.57 | 0.81 | 1.69                            |
| Cu-NE_HT450 | 80.7           | 0.90            | 0.54 | 0.30  | 2.92                          | 1.40 | 0.55 | 2.81                            |
| Cu-Gr_imp   | 86.0           | 0.27            | 0.48 | 1.67  | 0.12                          | 0.77 | 0.53 | 0.58                            |
| Cu-Gr_mix   | 50.6           | 7.50            | 3.14 | 2.06  | 6.20                          | 3.94 | 0.72 | 0.86                            |

(18) Characteristics of commercial Cu powder before and after electrochemical measurements

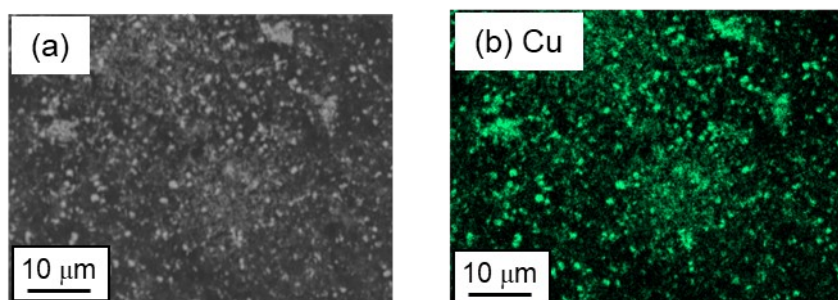

Figure S21. (a) SEM image and (b) SEM-EDX mapping image of commercial Cu powder which were taken for Cu powder loaded on carbon paper after electrochemical measurements.

(19) Characteristics of CuO powder before and after electrochemical measurements

CuO powder was prepared using the spent negative electrode composed of a graphite electrode layer and a copper current-collector substrate in the same manner as previously reported<sup>1)</sup>. The electrode was placed in a alumina crucible and heat treated at 650 °C for 3 h in air atmosphere (Heating rate of 5°C /min). The heat-treated product was ground evenly using a mortar and a pestle.

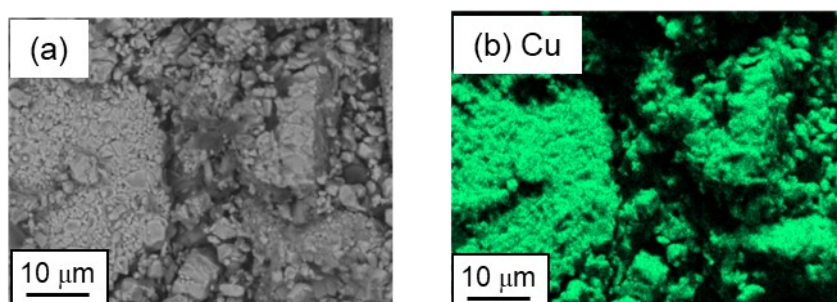

Figure S22. (a) SEM image and (b) SEM-EDX mapping image of commercial CuO powder which were taken for CuO powder loaded on carbon paper after electrochemical measurements.

(20) Electrochemical properties for commercial Cu powder and CuO samples

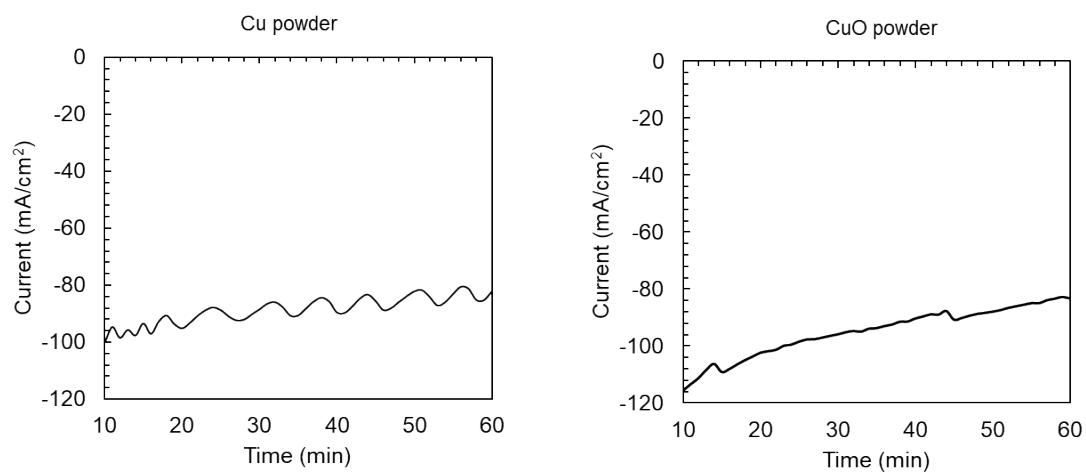

Figure S23. (a)-(c) Current density change on time for Cu powder and CuO samples.

Table.S4 Current efficiencies of C<sub>1</sub> (CO, CH<sub>4</sub> and formic acid) and C<sub>2+</sub> (C<sub>2</sub>H<sub>4</sub>, ethanol and propanol), and the C<sub>2+</sub>/C<sub>1</sub> ratio.

|            | H <sub>2</sub> | CH <sub>4</sub> | CO   | HCOOH | C <sub>2</sub> H <sub>4</sub> | EtOH | PrOH | C <sub>2+</sub> /C <sub>1</sub> |
|------------|----------------|-----------------|------|-------|-------------------------------|------|------|---------------------------------|
| Cu powder  | 39.3           | 2.40            | 3.48 | 0.44  | 29.5                          | 8.20 | 4.59 | 6.70                            |
| CuO powder | 66.6           | 1.01            | 0.94 | 0.69  | 10.0                          | 3.78 | 1.10 | 5.65                            |

(21) Comparison of the amount of the formed products.

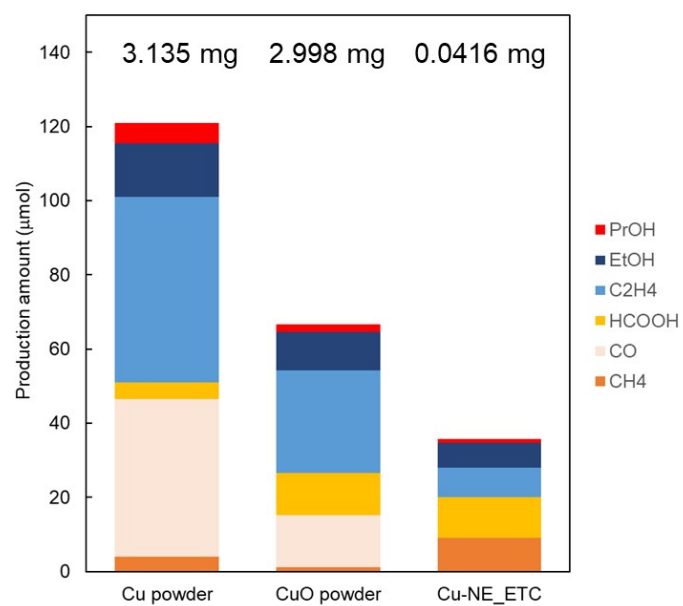

Figure S24. Comparison of the amount of the formed products. Cu amounts were 3.135 and 2.998 0.0416mg for commercial Cu powder and CuO powder, respectively. For Cu-NE\_ETC sample, Cu of ~ 0.04 mg were mixed with ~1.2 mg graphite powder.

(22) Electrochemical properties for Cu nanoparticles supported graphite (nanoCu-Gr\_mix sample)

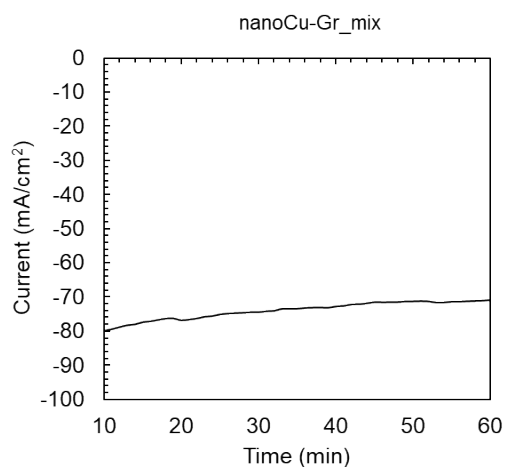

Figure S25. Current density change on time for nanoCu-Gr\_mix sample.

Table.S5 Current efficiencies of C<sub>1</sub> (CO, CH<sub>4</sub> and formic acid) and C<sub>2+</sub> (C<sub>2</sub>H<sub>4</sub>, ethanol and propanol), and the C<sub>2+</sub>/C<sub>1</sub> ratio.

|               | H <sub>2</sub> | CH <sub>4</sub> | CO   | HCOOH | C <sub>2</sub> H <sub>4</sub> | EtOH | PrOH | C <sub>2+</sub> /C <sub>1</sub> |
|---------------|----------------|-----------------|------|-------|-------------------------------|------|------|---------------------------------|
| nanoCu-Gr_mix | 41.9           | 4.53            | 1.40 | 5.27  | 28.0                          | 3.62 | 1.07 | 2.91                            |

Reference

- (1) Y. Zhao, H. Wang, X. Li, X. Yuan and X. Chen, Recovery of CuO/C catalyst from spent anode material in battery to activate peroxymonosulfate for refractory organic contaminants degradation”, *J. Hazardous Mater.*, 2021, **420**, 126552.
